# Supplementary material for: Quantitative 18F-FDG PET-CT scan characteristics correlate with tuberculosis treatment response
Source: EJNMMI Res. 2020 Feb 10;10:8. doi: 10.1186/s13550-020-0591-9 (PMC7010890; doi:10.1186/s13550-020-0591-9)
Supplement: Supplementary file 2 — Additional file 2: Supplementary dataset 1 [file 13550_2020_591_MOESM2_ESM.xlsx]

## Sheet: Key
Variable	Full name			Unit	Description
Sub ID	Subject Identification/S number
PET
TGAI	Total glycolytic activity index	∑ml/ml	This is the previous 'UptakePET' transformed to a millilitre unit. It's the total FDG activity (intensity) in the areas above threshold (metabolic tumor volume) and is a product of intensity and volume (very similar to total glycolytic activity).
MLV	Metabolic Lesion Volume	%	Extent: lung volume with FDG PET uptake above the threshold (metabolic tumor volume), expressed as percentage of whole lung volume
MSLA	Mean standardized lesion activity	Z-score	The normalised mean intensity of FDG uptake in the area of lung above the calculated threshold. (Threshold = 8, lowest number)
SUVmax	Maximum lesion intensity	g/ml	The level of FDG uptake at the most intense lesion in the lungs. Measured in Standard Uptake value.
CT
Cavity	Cavity volume	ml	The combined volume of cavites, expressed in ML
Vsoft	Soft density lesion volume	%	Lung lesions on CT that falls in the -500:-300HU density. The lower density range of TB lesions. It overlaps with normal lung vasculature.
Vmedium	Medium density lesion volume	%	Lung lesions on CT that falls in the -300:-100HU density. The medium density range of TB lesions
Vhard	High density lesion volume	%	Lung lesions on CT that is more dense than -100HU The upper density range for TB lesions
Combined PET/CT
TGAsoft	Soft lesion Glycolytic Ratio Activity	∑ml/ml	This is the Glycolytic Activity index, in the areas of Soft TB lesions (-500:-300)
TGAmed	Medium lesion Glycolytic Ratio Activity	∑ml/ml	This is the Glycolytic Activity index, in the areas of Medium density TB lesions (-300:-100HU)
TGAshard	Hard lesion Glycolytic Ratio Activity	∑ml/ml	This is the Glycolytic Activity index, in the areas of High density TB lesions (>-100HU)
MLVsoft	Soft lesion Extent	%	The volume with SOFT density lesions on CT and high FDG uptake
MLVmedium	Medium density lesion Extent	%	The volume with Medium density lesions on CT and high FDG uptake
MLVhard	High density lesion Extent	%	The volume with Hard density lesions on CT and high FDG uptake
Clinical
Rx missed	Days/dosages missed during treatment, as documented
Recurrence	Treatment restarted after the initial study period and proven cure
Xpert CT	The cycle value at baseline (dx) and W24. 40 = negative.
DX TTP	Baseline time to positivity (in days) of the MGIT culture. 42 = negative.
BMI	Body mass index
TB score	Symptom score, 0 = no symptoms/signs; 13 = max symptoms and signs
TTN	The time (in weeks) to sputum culture negativity
Dx CXR score	Extent of disease on baseline Chest X-ray. Maximum point 140 (100% high density opacification with cavity(s)), minimum point 0(no opacification or cavity).
Timepoints
1	Diagnosis
2	Month 1
3	Month 6
4	EOT+1
Outcome		Clinical outcome, based on whether culture negative status was achieved and if patients were re-diagnosed with PTB subsequantly.
M6 response pattern		Based on if there were FDG-Avid lesions seen at M6 and whether they have all showed less FDG avidity when compared to Diagnosis scan.
Max M6 lesion intensity		Grading of the most FDG-avid lesion's SUVmean at M6 compared to liver (right lobe) and blood pool (Aorta) SUVmean of the same scan to standardize.
SUVmax		This is the highest FDG-uptake in a single lung voxel. Note that this value often did not arise from corresponding lesions at Dx and M6.

## Sheet: Clinical info
Patient	Age	Prev TB?	Sex(m=0/F=1)	Rx missed total	Rx missed in initiation phase	Rx missed cont phase	Poor adherence?	Dx CXR score	Dx Xpert CT	W24 Xpert CT	W24 Xpert	Dx TTP	Smoker?	TTN(weeks)	Outcome	Evidence level	BMI BASE	BMI W24	M6 Response Pattern	Max M6 intesity	TGAI1	TGAI2	TGAI3	Impr TGA2	Impr TGA3	MLV1	MLV2	MLV3	MSLA1	MSLA2	MSLA3	SUVmax1	SUVmax2	SUVmax3	Cavity1	Cavity2	Cavity3	Vsoft1	Vsoft2	Vsoft3	Vmedium1	Vmedium2	Vmedium3	Vhard	Vhard	Vhard	Vtotal1	Vtotal2	Vtotal3
1	30	no	1	15	6	9	no	52.9167	20.8	40	Negative	6	currently smoke	10	Cure		17.5	17.5	Improved	Mild	1290.82	610.163	8.4544	yes	yes	9.89	5.44	0.14	16.01	12.68	9.92	14.2	15.2	1.7	2.94486	1.47524	0	5.59	5.63	5	3.04	2.25	1.49	3.39	0.98	0.66	12.02	8.86	7.15
2	21	no	0	33	0	33	Yes	22.0833	21.1	25.7	Positive	5	currently smoke	UE	UE		18.2	18.6	Mixed	High	2462.78	2490.24	453.92	no	yes	12.08	14.79	4.24	21.14	30.09	17.24	2.76	3.1	2.57	5.32664	6.28386	0.0506763	8.44	7.01	4.02	3.46	3.29	1.13	6.23	3.62	1.14	18.13	13.92	6.29
3	66	yes	0	2	2	0	no	97.9167	15.7	17.2	Positive	4	currently smoke	>24	Fail		17.7	18.5	Mixed	Very high	2434.56	2353.41	2883.46	no	no	11.31	10.62	13.3	16.85	17.62	19.3	7.65	9.8	4	63.4974	30.265	54.4883	4.64	3.87	3.61	2.71	2.23	2.51	3.64	2.68	2.9	10.99	8.78	9.02
4	40	no	0	0	0	0	no	75.8333	22.7	40	Negative	6	stopped smoking	6	Cure		17	18.9	Resolved	Minimal	5863.94	2233.28	116.205	yes	yes	27.54	15.67	1.25	30.06	20.83	10.12	11.63	9.4	3.54	7.35932	4.52145	2.4944	5.47	6.89	3.71	3.07	2.83	0.72	4.83	2.69	0.1	13.37	12.41	4.53
5	30	yes	1	1	0	1	no	64.5833	23.4	40	Negative	7	stopped smoking	6	Cure		17.8	16.6	Improved	High	4932.03	3476.48	117.357	yes	yes	21.02	19.45	2.38	62.35	45.22	11.59	12	9.8	5.47	15.9743	3.4291	0.0225228	2.96	3.58	1.7	1.9	2.96	0.42	8.26	5.36	0.15	13.12	11.9	2.27
7	58	yes	0	0	0	0	no	95.7917	14.6	31.6	Positive	5	currently smoke	8	Cure		17.3	16.9	Mixed	High	4789.12	4401.28	1346.88	no	no	21.68	21.95	11.03	22.71	28.22	11.98	6.02	8.1	7.52	2.64643	0.343473	0.213967	6.3	6.07	7.4	3.28	3.15	2.38	4.3	2.65	0.9	13.88	11.87	10.68
9	19	no	0	14	2	12	no	62.0833	23.7	40	Negative	5	currently smoke	8	Cure		21.1	23.8	Improved	Mild	2981.95	1996.03	169.978	yes	yes	22.07	19.05	2.21	21.34	15.16	10.05	7.52	4.5	2.23	15.7097	7.03838	0	4.45	4.7	2.25	2.26	1.47	0.7	1.44	0.41	0.17	8.15	6.58	3.12
13	48	yes	0	0	0	0	no	55	24	40	Negative	7	currently smoke	6	Cure		16.9	18.7	Improved	Moderate	2099.78	1236.16	395.398	yes	yes	8.96	7.23	3.05	21.2	17.11	12.34	7.64	4.1	4.24	3.59802	3.06873	0.349103	2.93	2.52	1.34	1.37	0.8	0.3	1.04	0.27	0.11	5.34	3.59	1.75
19	33	yes	1	58	5	53	Yes	89.1667	16.1	25.9	Positive	5	currently smoke	>24	Fail		22.5	26.4	Mixed	High	5392.83	6528	1174.53	no	yes	23.85	27.88	8.93	26.05	32.88	16.62	10.28	12	4.92	42.7708	31.1265	28.283	5.89	6.68	3.55	3.47	3.68	2.06	4.77	2.55	1.84	14.13	12.91	7.45
20	53	yes	1	7	0	7	no	63.5	20.4	40	Negative	5	currently smoke	4	Cure		20.8	22.1	Mixed	Moderate	1731.58	932.928	164.294	yes	yes	13.26	7.2	1.5	15.03	14.51	10.33	7.8	6.4	3.26	3.60365	3.10815	6.12057	4.95	4.34	3.52	2.9	1.64	1.2	6.94	0.47	0.6	14.79	6.45	5.32
21	46	yes	0	25	4	21	no	83.3333	17.5	22.3	Positive	4	currently smoke	>24	Fail		16.9	18.4	Mixed	High	4724.48	3859.33	5271.23	yes	no	20.33	20.67	23.81	13.67	13.63	20.07	7.06	6.9	5.8	16.4585	6.31765	7.3368	7.28	7.82	4.91	3.02	2.82	2.87	2.31	2.06	3.32	12.61	12.7	11.1
22	29	yes	1	4	3	1	no	45.8333	26.6	40	Negative	7	currently smoke	1	Recur	Definite	17.4	17.8	Improved	Very high	528.87	479.725	172.934	no	no	4.86	4.41	1.98	21.73	29.11	22.49	8.6	8.2	5.19	0.197075	0.0619377	0.152029	3.55	3.14	2.94	1.4	0.83	1.01	2.86	1.53	0.78	7.81	5.5	4.73
24	43	no	0	4	0	4	no	12.9167	21.2	40	Negative	10	currently smoke	8	Cure		16.9	17.3	Mixed	High	783.104	1041.34	310.349	no	no	5.17	7.49	2.22	12.85	14.02	14.03	5.9	5.6	5.34	0.230859	0.0619377	0.945958	4	2.13	1.88	1.9	0.79	0.56	0.94	0.41	0.3	6.84	3.33	2.74
27	28	yes	0	66	39	27	Yes	89.1667	14.5	29.3	Positive	4	currently smoke	>24	Fail		20.6	21.3	Mixed	Very high	5671.49	5581.25	5601.73	no	no	34.27	41.13	34.33	28.73	34.47	26.22	14.53	11.7	10.59	156.184	106.291	78.9086	6.61	8.47	8.4	4.98	5.52	5.78	6.99	3.69	6.1	18.58	17.68	20.28
29	42	no	0	6	0	6	no	71.4583	24.7	40	Negative	9	currently smoke	4	Cure		13.1	14.5	Resolved	Minimal	8256	6287.42	221.171	yes	yes	14.79	13.52	1.42	23.78	30.69	10.46	12.03	12.5	1.97	6.419	2.09462	1.31758	5.26	3.87	1.61	2.48	2.08	0.46	4.58	3.37	0.15	12.32	9.32	2.22
30	25	no	0	4	0	4	no	44.6667	27.2	27.6	Positive	8	stopped smoking	4	Cure		17.1	18.7	Improved	MIld	3051.58	999.488	600.352	yes	yes	12.08	7.29	5.53	29.04	16.09	14.04	19.43	5.1	2.5	1.27817	1.45835	0.213967	4	3.79	2.89	2.18	1.7	1.14	4.23	2.05	0.95	10.41	7.54	4.98
34	33	no	0	3	0	3	no	53.75	27.2	30.4	Positive	9	currently smoke	6	Recur	Moderate	16.3	18.6	Resolved	Minimal	1309.95	298.752	134.362	yes	yes	12.3	3.81	2.55	18.62	10.56	9.85	3.98	4.2	1.81	0.591224	0.0112614	0	5.05	3.71	6.93	1.7	1.1	1.09	1.69	0.99	0.71	8.44	5.8	8.73
35	28	no	0	32	0	32	Yes	77.0833	17.8	40	Negative	5	currently smoke	10	Cure		17.3	18.8	Mixed	Moderate	4793.22	2151.49	311.955	yes	yes	18.2	12.55	2.43	25.07	18.09	11.28	12	6.9	3.22	9.20056	2.61264	0.152029	4.09	3.22	3.5	2.65	1.56	1.24	2.98	0.98	0.45	9.72	5.76	5.19
41	35	no	1	2	2	0	no	57.0833	40	40	Negative	20	currently smoke	8	Cure		20.8	23.7	Resolved	Minimal	384.96	167.469	21.0605	yes	yes	4.47	2.76	0.41	15.36	12.57	9.12	5.35	3.9	1.96	2.44935	0.140768	0	4.41	6.9	11.01	1.9	2.08	2.88	2.02	1.27	0.96	8.33	10.25	14.85
42	32	yes	1	7	1	6	no	49.5833	18.7	30.3	Positive	4	currently smoke	8	Cure		17.1	19.4	Improved	Moderate	1603.14	753.472	119.232	yes	yes	12.2	6.48	1.26	22.87	20.49	14.77	6.24	6.2	4.01	10.8053	1.93696	0.304058	3.2	3.79	2.95	1.61	1.74	0.9	2.32	1.47	0.5	7.13	7	4.35
43	18	no	0	0	0	0	no	15.8333	21.6	40	Negative	5	stopped smoking	>24	Fail		16.7	18.5	Mixed	Moderate	391.674	286.157	170.048	yes	no	2.88	3.15	1.63	10.85	10.8	11.61	3.46	3	2.86	3.42347	3.0631	0.540547	3.42	3.43	3.23	1.61	1.41	1.14	1.86	0.85	0.47	6.89	5.69	4.84
49	21	no	1	1	1	0	no	98	19.5	40	Negative	3	stopped smoking	8	Cure	None	18.6	19	Improved	moderate	2400.19	2619.97	580.858	no	yes	17.03	21.22	7.88	21.63	39.21	16.88	9.1	9.8	2.84	139.045	128.926	278.151	3.82	3.08	2.37	2.23	2.18	1.58	10.82	10.62	3.45	16.87	15.88	7.4
50	38	no	0	0	0	0	no	72. 67	19.9	40	Negative	6	currently smoke	24	Cure		20.5	20.5	IMproved	High	5096.96	5057.02	1460.86	no	no	12.9	12.1	5.78	28.83	28.16	18.29	9	9.7	5.14	13.7333	4.92123	4.33564	2.63	3.19	2.47	1.85	2.14	1.41	2.85	1.98	1.18	7.33	7.31	5.06
51	52	no	0	7	0	7	no	15.83	22.5	40	Negative	6	currently smoke	4	Cure		18.9	20	Improved	High	1685.38	1553.86	452.698	no	no	7.8	9.12	3.66	28.51	23.86	16.22	8.36	5.5	4.13	2.25791	0.0506763	0	2.2	2.85	1.35	1.05	1.27	0.35	1.56	1.62	0.16	4.81	5.74	1.86
52	44	no	1	0	0	0	no	70	19.3	40	Negative	6	currently smoke	8	Cure		17.2	17.7	Improved	High	3267.14	3187.52	1291.52	no	no	26.9	26.99	17.02	23.86	27.35	14.93	10.95	14.8	5.39	6.1994	0.743252	0.287166	4.19	3.13	3.3	2.37	1.62	1.39	3.34	1.66	1.17	9.9	6.41	5.86
53	31	yes	0	21	4	17	no	17.5	15.7	40	Negative	4	currently smoke	8	Cure		16.8	17.8	Mixed	Moderate	10368	11968	553.005	no	yes	29.24	29.98	4.95	36.83	49.63	10.36	17.62	15.8	2.12	31.1152	7.95055	2.77594	5.14	4.55	2.52	3.96	3.79	0.87	4.54	4.82	0.45	13.64	13.16	3.84
54	55	yes	0	0	0	0	no	64.5833	24.7	29.3	Positive	10	stopped smoking	24	Cure		18.8	19.1	Resolved	None	205.978	69.9712	123.763	yes	no	1.1544	0.50422	0.88654	12.197	9.742	10.21	4.94	4	1.63	7.61834	8.46294	7.26923	2.5045	1.6105	1.4813	1.2633	0.57995	0.59472	0.92533	0.26596	0.2438	4.69313	2.45641	2.31982
70	27	no	0	7	1	6	no	59.5833	19.5	40	Negative	4	currently smoke	12	Cure		15.1	16.3	Mixed	Moderate	2225.15	1851.65	526.995	yes	yes	19.03	20.01	5.67	16.06	17.62	17.18	6.07	7.9	5.02	49.6684	30.6817	22.0217	3.56	2.6	2.25	1.82	0.74	0.66	1.04	0.17	0.31	6.42	3.51	3.22
71	33	yes	0	0	0	0	no	47.5	20.6	40	Negative	6	currently smoke	4	Cure		19.4	18.8	Improved	Mild	1897.15	879.744	302.989	yes	yes	11.18	7.59	3.81	24.86	21.75	13.89	7.4	7	3.65	1.62164	0.354734	0.0788298	3.2	3.43	1.89	2.04	1.27	0.42	2.57	0.66	0.09	7.81	5.36	2.4
72	25	no	0	3	0	3	no	52.2917	17.4	40	Negative	3	currently smoke	24	Cure		16.6	19.1	Improved	High	2463.74	2202.62	360.685	yes	yes	18.13	17.18	3.47	18.75	22.56	17.99	6.5	7.6	5.4	8.51362	0.681315	0.298427	4.89	4.05	2.78	2.13	1.54	0.79	1.66	1.45	0.46	8.68	7.04	4.03
73	26	no	1	42	1	41	Yes	50.8333	21.8	40	Negative	5	currently smoke	UE	UE		18.5	18.7	Resolved	None	1639.1	302.323	40.7846	yes	yes	12.56	2.95	0.84	33.72	17.6	9.72	6.5	3.8	1.03	5.29849	0.39978	0.247751	3.06	2.91	1.63	1.49	0.92	0.34	2.21	0.58	0.01	6.76	4.41	1.98
76	36	yes	0	0	0	0	no	73.75	27.6	40	Negative	7	currently smoke	8	Cure		19	20.1	Resolved	Minimal	8384	8576	832.32	no	yes	31.49	35.93	5.37	19.08	24.47	11.46	8.6	12.6	1.66	24.9947	7.42689	3.15882	3.77	3.51	1.67	1.88	1.96	0.64	2.58	2.44	0.24	8.23	7.91	2.55
77	31	no	0	15	0	15	no	54.1667	19.6	40	Negative	5	currently smoke	4	Cure		16.8	19.1	Improved	Mild	3226.37	1283.84	214.515	yes	yes	11.6	6.99	1.62	28.96	22.86	12.93	6.7	8.1	2.49	2.06647	0.15766	1.63853	3.58	1.71	1.77	1.81	0.58	0.75	1.84	0.36	0.28	7.23	2.65	2.8
78	39	no	0	0	0	0	no	56.6667	25.9	40	Negative	7	currently smoke	12	Cure		16.5	19.7	Improved	Mild	2914.24	1512.7	107.987	yes	yes	13.08	7.62	1.24	32.86	30.32	10.74	14.2	14	2.57	6.13746	1.59912	0.793929	4.91	4.9	2.76	2.07	1.69	0.67	3.91	2.78	0.23	10.89	9.37	3.66
80	47	yes	1	0	0	0	no	58.3333	20.7	40	Negative	6	currently smoke	UE	UE		21.6	21.3	Improved	Moderate	1008.83	705.408	286.957	yes	no	9.15	7.94	4.37	23.92	19.56	13.19	10.75	6	3.73	0.377257	0.24212	1.40768	4.19	5.1	5.1	1.98	1.73	1.71	2.09	1.01	0.86	8.26	7.84	7.67
81	22	no	0	3	1	2	no	52.9167	14.8	40	Negative	5	currently smoke	8	Cure		14.9	16.3	Mixed	High	3685.12	3241.41	1521.09	yes	no	22.79	24.94	12.82	26.95	20.89	17.95	6.97	6.6	5.41	33.3619	11.0531	0.326581	3.91	5.72	4.02	2.08	3.47	1.67	1.68	4.98	1.02	7.67	14.17	6.71
83	22	no	0	7	2	5	no	46.0417	37.4	40	Negative	14	currently smoke	4	Cure		18.7	19.3	Improved	High	801.664	148.192	92.7104	yes	yes	4.47	1.37	0.78	13.33	13.49	10.96	5.31	4.6	2	0.140768	0.0112614	0.0143734	3.51	3.01	2.17	1.43	0.59	0.41	0.58	0.08	0.06	5.52	3.68	2.64
84	57	yes	0	0	0	0	no	72.8333	17.1	32.4	Positive	4	stopped smoking	8	Cure		21.4	21.7	Mixed	Very high	5798.14	3977.79	1100.67	yes	yes	19.3	14.64	4.57	17.18	17.33	16.88	8.6	10.1	3.45	35.6142	45.9578	6.73704	3.86	3.41	2.27	2.08	1.79	1.1	1.77	0.99	0.88	7.71	6.19	4.25
85	26	no	0	0	0	0	no	80.4167	24.1	40	Negative	4	currently smoke	12	Cure		19.6	21.7	Improved	High	3328.96	1741.63	354.368	yes	yes	17.24	12.21	4.23	28.15	25.06	13.86	7.8	8	2.94	15.5407	3.17571	0.505124	5.92	4.91	8.54	3.37	2.21	1.63	4.89	1.57	0.56	14.18	8.69	10.73
86	19	no	1	0	0	0	no	61.0417	16.4	40	Negative	5	never smoked	12	Cure		16.4	19.1	Improved	High	3153.15	1758.46	453.446	yes	yes	19.11	15.64	7.35	23.16	19.94	15.83	7.56	8.4	4.21	54.4263	56.1043	175.04	4.7	5.44	4.48	3.06	3.08	1.61	7.84	3.43	0.69	15.6	11.95	6.78
87	21	no	0	5	0	5	no	53.125	31.6	40	Negative	6	currently smoke	8	Cure		17.2	18.7	Improved	Mild	4136.96	3141.25	91.6928	yes	yes	28.01	23.88	1.32	20.12	19.71	10.71	10.4	9.9	2.1	12.1285	3.50793	1.57903	5.01	3.37	1.41	2.45	1.21	0.21	1.51	0.55	0.05	8.97	5.13	1.67
88	46	no	0	1	1	0	no	52.0833	31.6	40	Negative	12	currently smoke	8	Recur	Strong	18.2	18.3	Mixed	High	963.584	1275.33	376.851	no	no	5.05	7.6	2.59	12.17	13.51	11.27	3.69	4.6	2.88	0	0	0	4.12	2.68	2.19	2.01	1.11	0.8	1.96	0.84	0.64	8.09	4.63	3.63
89	25	no	1	84	2	82	Yes	75.8333	17.7	40	Negative	5	currently smoke	8	Cure		18.8	18.2	Mixed	Moderate	1100.48	616.499	131.533	yes	yes	5.89	4.76	1.36	25.23	20.23	10.43	9.1	7.3	3.07	0.827713	0.40541	0	3.39	2.19	2.28	2.04	0.69	0.54	1.64	0.14	0.05	7.07	3.02	2.87
90	23	no	1	5	0	5	no	47.5	29.1	40	Negative	6	currently smoke	4	Cure		20.2	22.9	Improved	High	1618.88	1181.44	62.5856	yes	yes	15.15	15.03	1.11	21.91	19.17	11.37	7.49	8.4	3.57	16.0756	10.0677	17.1126	6.63	7.97	5.53	3.54	2.98	1.09	3.69	2.06	0.11	13.86	13.01	6.73
91	28	no	0	7	0	7	no	90	28	40	Negative		stopped smoking	8	Cure		18.9	19.1	Improved	Moderate	1526.02	1081.09	8.61248	yes	yes	4.45	3.82	0.08	32.59	25.22	9.25	13.3	11.2	1.87	11.3459	9.01475	6.76168	2.11	2.72	1.54	1.24	1.35	0.48	1.36	0.93	0.26	4.71	5	2.28
92	42	no	0	0	0	0	no	3.54167	20.8	40	Negative	11	never smoked	12	Cure		18.5	21	Mixed	High	3943.42	4118.46	752.512	no	yes	36.64	33.32	11.69	22.26	21.63	17.37	8.8	9.6	3.09	78.9086	41.6503	11.2503	9.11	9.59	6.69	5.67	5.7	2.67	5.79	4.23	1.11	20.57	19.52	10.47
93	30	no	0	6	6	0	no	56.5417	40	40	Negative	20	currently smoke	0.3	Recur	Strong	19.6	19.2	Improved	High	134.778	80.1152	34.953	yes	no	1.84	1.04	0.67	11.92	11.49	9.81	6	4.5	3.29	0.118245	0.0675684	0.082134	4.92	3.8	1.93	1.47	0.43	0.18	0.56	0.11	0.01	6.95	4.34	2.12
95	46	yes	0	4	0	4	no	60.8333	21.3	26.5	Positive	7	currently smoke	20	Recur	Moderate	23	26.3	Mixed	Moderate	5510.21	4489.92	1446.66	yes	no	21.31	20.83	9.24	22.82	19.23	14.18	8.7	8.3	3.98	33.4858	27.2019	25.9502	3.33	3.68	2.3	2.13	1.67	0.78	1.84	0.9	0.28	7.3	6.25	3.36
98	46	yes	1	0	0	0	no	53.3333	29.7	40	Negative	13	currently smoke	8	Cure		13.5	16.1	Mixed	High	747.712	605.869	60.9997	yes	yes	9.45	4.11	1.03	17.16	28.67	11.75	10	4.6	4.54	0.822082	1.44146	1.79257	11.72	9.92	7.49	3.57	2.52	1.66	2.07	1.4	0.19	17.36	13.84	9.34
99	37	no	1	2	2	0	no	16.6667	22.2	40	Negative	13	currently smoke	4	Cure		17.2	17.6	Mixed	HIgh	599.187	251.565	31.4605	yes	yes	7.34	3.26	0.58	19.66	19.04	12.59	9.2	8	3.59	5.04713	0.889651	0.79054	7.12	6.02	15.7	2.38	1.33	2.6	2.09	0.52	0.72	11.59	7.87	19.02
100	55	yes	1	9	0	9	no	64.5833	21.6	40	Negative	10	currently smoke	4	Cure		18.9	22.5	mixed	Very High	524.595	524.09	285.856	no	no	6.05	6.91	4.31	16.34	15.48	11.82	6.59	4.3	3.83	0.574331	0.799559	0.0164268	3.51	2.83	3.71	1.86	1.19	1.28	2.17	0.71	0.61	7.54	4.73	5.6
101	28	no	1	32	20	12	Yes	49.1667	16.2	26.3	Positive	4	currently smoke	12	Recur	Definite	18	19.1	Improved	High	1373.25	1461.57	842.048	no	no	12.43	18.43	11.61	14.64	16.82	14.16	4.9	3	2.29	17.5453	8.01423	12.1948	4.4	6.42	3.81	2.57	3.23	1.95	3.76	3.18	2.04	10.73	12.83	7.8
102	39	no	1	0	0	0	no	51.25	18.6	40	Negative	13	currently smoke	4	Cure		16.6	18.6	Mixed	Moderate	334.4	156.051	38.6253	yes	yes	6.08	3.65	0.84	13.95	13.1	12.32	4.71	4.9	3.59	0.118245	0	0	4.06	4.2	3.35	1.56	0.75	0.41	0.82	0.22	0.12	6.44	5.17	3.88
103	43	no	1	0	0	0	no	62.5	29.2	28.2	Positive	8	currently smoke	12	Cure		18.5	20.8	improved	Moderate	1808.32	940.736	285.171	yes	yes	9.41	7.29	2.65	28.91	25.4	16.92	7.23	11.2	4.42	1.29506	0.79054	1.1314	2.83	2.19	0.92	1.73	0.79	0.24	1.89	0.53	0.06	6.45	3.51	1.22
104	42	no	0	0	0	0	no	5	22.3	40	Negative		stopped smoking	8	Cure		16.2	18.7	Mixed	High	638.662	392.32	47.8797	yes	yes	8.06	5.17	0.54	13.86	14.24	16.05	4.69	4.1	5.49	0	0.677605	0	3.16	1.61	1.36	1.32	0.36	0.27	0.41	0.04	0.06	4.89	2.01	1.69
105	21	no	0	0	0	0	no	12.5	22.7	40	Negative		currently smoke	1	Cure		15.8	17.1	Resolved	Minimal	553.069	219.859	42.2477	yes	yes	3.13	1.8	0.55	25.28	16.37	9.98	5.68	3.8	2.35	0.129506	0.0657072	0	2.6	2.37	2.7	1	0.51	0.52	0.68	0.08	0.03	4.28	2.96	3.25
108	29	yes	0	0	0	0	no	57.0833	26.3	40	Negative	10	currently smoke	8	Cure		20.3	20.2	Improved	Moderate	1437.82	1244.93	76.8576	yes	yes	13	13.63	1.68	27.89	23.64	10.68	7.77	8.2	2.66	21.9154	6.72883	0.418883	3.98	4.51	5.18	2.08	1.7	1.39	2.44	1.71	2.86	8.5	7.92	9.43
111	22	no	0	0	0	0	no	10	28.7	40	Negative	3	currently smoke	12	Cure		20.9	20.7	Improved	Moderate	1153.92	1046.53	348.48	no	no	7.29	9.18	4.04	17.54	18.27	14.78	4.7	5.5	3.22	3.55435	2.25047	0.837767	2.41	1.87	1.22	1.56	0.91	0.41	2.58	0.56	0.13	6.55	3.34	1.76
112	52	yes	0	4	2	2	no	66.6667	17.3	40	Negative	4	currently smoke	8	Recur	Definite	21	20.7	Mixed	High	1836.74	1279.23	684.864	yes	no	9.21	8.05	5.47	30.45	23.7	16.78	11.4	9.1	4.84	25.5252	19.8087	21.5088	2.58	2.21	1.59	1.58	1.11	0.59	1.68	0.7	0.19	5.84	4.02	2.37
123	40	no	0	0	0	0	no	68.75	21.2	23.1	Positive	5	currently smoke	12	Cure		18.8	18.8	Mixed	High	3236.61	915.392	359.014	yes	yes	29.97	12.11	5.4	21.82	14.16	18.26	8.16	4	3.12	10.2113	10.5994	6.66928	4.68	4.71	1.71	2.39	2.17	0.53	1.3	1.63	0.13	8.37	8.51	2.37
124	24	no	0	32	0	32	Yes	47.9167	23	40	Negative	4	currently smoke	8	Cure		15.5	17.2	Improved	Mild	211.187	388.691	82.8992	no	no	2.88	5.8	1.23	17.17	18.58	14.59	3.3	6.2	2.73	0.0985608	0	0	4.32	4.49	8.24	1.33	0.98	0.83	0.61	0.29	0.33	6.26	5.76	9.4
125	32	no	0	0	0	0	no	61.6667	24.6	40	Negative	8	currently smoke	12	Cure		16.5	18.3	Improved	Mild	5429.82	3513.41	67.6608	yes	yes	23.66	19.17	0.67	28.92	23.82	11.88	10.97	10.2	3.1	17.3323	8.5789	1.62009	7.21	7.21	2.04	3.94	2.94	0.37	4.53	4.01	0.04	15.68	14.16	2.45
126	39	no	0	1	0	1	no	72.5	19.1	40	Negative	5	stopped smoking	8	Cure		16.9	17.7	Improved	moderate	3421.5	1259.46	63.1776	yes	yes	22.05	10.85	1.1	26.22	17.66	11.96	10.2	10.1	3.69	48.457	16.5274	0.193015	5.59	7.99	5.45	3.53	4.77	2.61	10.96	10.76	10.61	20.08	23.52	18.67
128	22	no	0	26	11	15	no	69.5833	19.3	33.4	Positive	5	currently smoke	24	Cure		17.1	18	Improved	High	4297.34	3755.46	528.704	yes	yes	32.88	31.89	5.21	20.04	22.15	18.51	12.6	8.8	4.74	3.78432	0.340856	0.609845	6.48	10.59	2.35	2.59	3.45	0.68	4.72	4.51	1.13	13.79	18.55	4.16
129	39	no	0	9	0	9	no	53.3333	18	40	Negative	4	currently smoke	12	Cure		18.8	18.4	Improved	Moderate	2951.23	1650.75	59.2006	yes	yes	21.45	11.46	0.66	23.08	26.26	15.71	7.04	6.5	3.35	2.50303	0.85214	1.02051	9.29	5.95	2.56	4.48	2.67	0.59	7.65	3.31	0.13	21.42	11.93	3.28
130	29	no	0	1	0	1	no	50.2083	23.8	40	Negative	6	currently smoke	8	Recur	Strong	16.5	17.5	Improved	Mild	994.176	707.456	26.0019	yes	yes	10.73	8.59	0.44	19.32	18.31	11.79	5.53	5.4	2.44	6.48859	1.12318	0.511284	4.52	3.11	2.46	2.03	1.01	0.43	1.33	0.29	0.06	7.88	4.41	2.95
131	18	no	1	0	0	0	no	3.33333	40	40	Negative	14	never smoked	4	Cure		14.9	16.9	Improved	Very high	85.8048	157.286	2.68928	no	yes	1.39	2.64	0.1	19.86	23.1	9.5	10.6	12	4.9	0	0	0	2.96	3.51	2.56	0.82	1.32	0.17	0.19	0.49	0	3.97	5.32	2.73
132	17	yes	1	16	1	15	no	57.5	18.4	40	Negative	5	currently smoke	12	Cure		18.2	20.1	Mixed	High	1055.81	693.056	265.267	yes	no	15.07	13.97	6.29	26.66	24.43	12.35	6.82	7.1	2.38	3.72272	3.37365	0	6.51	4.54	4.62	3.04	1.92	1.57	4.25	1.34	1.02	13.8	7.8	7.21
133	33	yes	1	13	3	10	no	57.0833	21	33.7	Positive	6	currently smoke	20	Cure		17.8	19.5	Improved	High	1632.96	1037.12	293.216	yes	yes	13.15	9.23	3.5	20.21	17.83	12.2	7.52	6.7	3.92	28.406	16.1455	8.74316	3.16	2.72	1.71	1.85	1.19	0.6	1.55	0.4	0.21	6.56	4.31	2.52
134	24	no	1	0	0	0	no	71.0417	14.8	40	Negative	3	currently smoke	8	Cure		18.1	20.6	Resolved	Minimal	1508.42	591.885	27.7459	yes	yes	30.19	16.96	0.91	21.73	15.72	10.5	5.97	4.9	0.99	4.20526	2.33055	0.831607	7.07	4.95	5.73	3.4	2.43	2	2.94	0.88	0.56	13.41	8.26	8.29
135	17	yes	0	3	1	2	no	76.6667	25.2	40	Negative	8	stopped smoking	8	Cure		21.2	24.2	Improved	Very high	4243.9	5194.62	1314.94	no	no	28.21	32.38	12.42	48.78	64.5	32.42	8.74	9.1	7.4	18.6013	33.831	3.40651	4.24	5.45	3.85	3.18	4.76	2.55	8.05	9.08	3.01	15.47	19.29	9.41
136	41	no	0	0	0	0	no	45.4167	40	40	Negative	18	currently smoke	8	Cure		16.7	16.7	Improved	High	344.205	288.038	143.866	yes	no	2.74	2.37	1.58	18.73	18.72	14.52	10.04	8.3	4.85	0.178641	0	0	1.99	1.94	1.55	0.76	0.38	0.49	0.2	0.1	0.4	2.95	2.42	2.44
137	44	no	1	0	0	0	no	72.9167	24.4	30.2	Positive	7	currently smoke	8	Recur	Definite	40.5	41	Improved	High	2006.34	2096.51	405.965	no	yes	28.92	29.15	11.66	20.32	18.94	12.68	10.91	10.5	5.36	7.83558	7.60561	4.10465	19.29	15.78	17.62	6.19	4.94	4.29	6.92	6.72	2.54	32.4	27.44	24.45
138	23	no	0	13	2	11	no	85	20.9	40	Negative	4	currently smoke	8	Cure		23.4	23.6	Improved	High	7872	7488	237.107	no	yes	47.76	49.65	2.19	33.28	31.71	11.43	11.5	12.1	3.03	38.2252	11.9402	0	6.97	8.29	4.69	4.11	3.92	1.75	4.32	3.76	1.78	15.4	15.97	8.22
139	38	yes	0	36	5	31	Yes	73.3333	19.6	40	Negative	5	currently smoke	12	Cure		16.8	21.4	improved	Moderate	1680.83	1388.16	189.818	yes	yes	13.87	12.12	2.5	20.9	20.3	11.69	5.93	7.5	2.87	35.3156	20.8702	1.31209	5.37	4.84	3.56	2.93	2.06	1.05	2.43	1.17	0.21	10.73	8.07	4.82
140	22	no	0	25	0	25	no	3.33333	19	31.8	Positive	6	currently smoke	12	Recur	Definite	16.8	18	improved	Mild	1735.81	953.024	222.214	yes	yes	8.29	8.24	2.68	30.54	24.71	12.56	10.82	4.6	2.43	0.733046	0.119094	0	2.99	3.59	2.06	1.48	1.34	0.56	2.85	0.54	0.07	7.32	5.47	2.69
141	17	no	0	5	0	5	no	50	34	40	Negative	10	currently smoke	4	Cure		18.3	20.5	Resolved	NOne	182.042	89.1904	9.89952	yes	yes	2.74	1.77	0.27	21.08	14.99	9.05	5.57	2.6	0.76	0.0657072	0	0	3.67	1.99	1.74	1.24	0.43	0.24	0.71	0.04	0.02	5.62	2.46	2
142	43	yes	1	0	0	0	no	87.9167	15.3	32.3	Positive	3	currently smoke	20	Recur	Definite	41.7	42.9	Mixed	Very high	1980.86	2019.58	922.176	no	no	21.99	22.79	14.97	25.62	28.8	21.59	9.27	11	5.41	5.88079	6.44136	7.75961	4.68	4.31	3.62	2.56	2.32	1.39	2.34	1.4	0.45	9.58	8.03	5.46
144	31	yes	0	23	2	21	no	80	23.2	40	Negative	7	currently smoke	12	Cure		19.7	18.2	Mixed	High	1578.37	1383.42	197.382	yes	yes	15.47	16.81	2.35	15.17	15.35	10.84	6.59	3.8	4.83	22.8784	7.42697	3.59131	5.29	5.27	2.77	2.34	1.34	0.65	0.84	0.26	0.1	8.47	6.87	3.52
145	19	no	1	14	3	11	no	64.17	15.8	40	Negative	4	currently smoke	8	Cure		22.1	24	Improved	High	1253.57	147.296	12.912	yes	yes	15.6	3.51	0.38	28.31	13.88	10.84	6.98	7	3.19	7.08816	1.43118	0	6.41	7.7	3.18	2.99	1	0.43	4.01	0.27	0.01	13.41	8.97	3.62
146	20	yes	0	0	0	0	no	69.17	25.7	35	Positive	8	currently smoke	8	Cure		16.8	16.7	Improved	high	2685.06	1872.19	524.25	yes	yes	21.49	15.73	6.82	28.29	25.94	17.78	6.54	3.4	3.93	11.5234	1.97738	1.75356	6.49	5.03	3.5	4.41	3.44	1.29	4.93	3.14	0.26	15.83	11.61	5.05
147	23	no	0	0	0	0	no	65	14.6	40	Negative	5	never smoked	8	Cure		19	20.3	Mixed	Very high	2854.4	2802.5	294.79	no	yes	23.38	24.83	3.2	19.37	19.64	13.52	9.5	9	2.86	21.2234	12.4371	0	3.73	3.37	1.53	1.63	1.28	0.42	1.03	0.8	0.23	6.39	5.45	2.18
149	19	no	1	4	0	4	no	64.5833	13.6	40	Negative	3	never smoked	12	Cure		18.7	19.8	Improved	Moderate	901.696	730.944	313.478	yes	no	19.59	18.78	13	28.31	25.72	15.14	7.44	7	3.22	5.56047	3.14368	0.913741	5.36	5.52	7.04	2.97	3.81	2.83	8.66	4.71	1.7	16.99	14.04	11.57
150	21	yes	1	60	4	56	Yes	59.5833	18.9	32.7	Positive	6	stopped smoking	4	Cure		19.3	20	Mixed	High	477.12	187.565	48.4851	yes	yes	3.88	2.28	0.89	23.61	15.57	10.31	6.92	4.2	2.68	1.14782	0.43531	0	3.3	3.38	3.38	1.75	1.27	0.85	1.6	0.31	0.13	6.65	4.96	4.36
152	23	no	1	0	0	0	no	61.6667	17.5	40	Negative	7	currently smoke	8	Recur	Definite	19.9	20.3	Improved	high	312.518	227.078	64.8896	yes	yes	6.55	5.66	1.75	17.87	19.75	15.21	5.33	4.6	3.41	0.119094	0.145788	0	4.88	4.3	3.49	2.09	0.98	0.49	2.32	0.58	0.15	9.29	5.86	4.13
153	25	no	0	64	11	53	Yes	55.8333	16	24.8	Positive	5	currently smoke	12	Cure		16.9	17	Resolved	Minimal	1221.95	646.208	136.352	yes	yes	17.1	11.38	2.79	16.84	13.33	10.72	5.92	5.7	1.72	8.45775	1.27924	0	4.16	2.48	1.72	1.77	0.5	0.36	1.03	0.09	0.03	6.96	3.07	2.11
154	42	no	1	0	0	0	no	75	12.2	23.2	Positive	4	currently smoke	20	Cure		15.1	17.8	Improved	high	2294.21	1489.98	461.414	yes	yes	20.08	13.53	5.86	20.99	19.58	16.45	4.2	6.7	4.3	19.2851	15.9956	5.37156	4.02	3.1	1.76	1.52	1.42	0.61	1.21	1.23	0.31	6.75	5.75	2.68
155	36	no	1	3	1	2	no	7.91667	23.5	40	Negative	8	never smoked	1	Cure		18.3	19	Resolved	Minimal	160.314	63.4157	61.4579	yes	no	2.33	1.23	1.59	15.19	11.72	10.24	4.3	2.5	1.21	0	0	0	2.21	1.08	0.9	0.68	0.22	0.17	0.38	0.09	0.02	3.27	1.39	1.09
156	64	no	0	1	1	0	no	59.5833	10.9	Error		3	currently smoke	12	Cure		18.9	23.4	Mixed	High	2958.85	1391.68	300.397	yes	yes	16.13	11.59	2.48	24.66	17.56	12.68	7.51	5.8	3.95	14.1291	5.33871	0.975341	2.72	1.97	2.51	1.53	0.75	0.81	1.25	0.24	0.27	5.5	2.96	3.59
159	19	no	1	0	0	0	no	53.125	17.2	40	Negative	5	never smoked	8	Cure		18.6	21.6	Resolved	Minimal	702.848	272.666	8.48896	yes	yes	11.96	6.8	0.31	24.28	15.86	9.45	5.36	4.5	1.73	8.29553	1.79873	1.16425	5.32	4.45	5.88	2.8	1.16	1.34	1.7	0.11	1.73	9.82	5.72	8.95
160	40	no	1	0	0	0	no	90.4167	15.2	40	Negative	4	stopped smoking	12	Cure		17.1	19.1	Improved	Moderate	1950.27	1578.05	173.178	yes	yes	29.78	24.62	4.67	19.33	21.82	13.41	6.8	8.1	2.7	35.6605	15.9176	6.39003	6.59	7.77	4.68	3.96	3.69	1.54	5.15	5.04	0.53	15.7	16.5	6.75
161	25	no	1	8	1	7	no	58.5417	12.3	26	Positive	3	stopped smoking	20	Cure		15.8	18.9	Improved	high	1178.88	878.016	328.371	yes	no	17.35	14.72	7.53	21.41	20.74	14.66	5.61	6.8	5.58	5.22783	1.85623	2.21762	4	3.46	2.49	2.25	2.18	0.74	2.71	1.44	0.35	8.96	7.08	3.58
162	49	no	0	1	0	1	no	67.9167	14.8	30.8	Positive	6	currently smoke	12	Cure		18.5	19.8	Improved	Moderate	2332.29	1382.66	299.962	yes	yes	12.23	11.23	3.02	25.29	19.84	14.2	9	6.3	3	82.1648	24.7018	7.85201	3.97	4.56	2.27	2.06	1.89	0.6	3.56	2.46	0.12	9.59	8.91	2.99
163	25	no	0	3	0	3	no	84.17	15.4	23	Positive	4	currently smoke	>24	Fail		17	19.9	Mixed	High	5985.6	4338.75	1324.16	yes	yes	35.93	35.52	8.43	20.22	17.21	12.11	5.12	4.2	2.65	111.979	43.0362	26.0878	5.58	5.21	4.18	3.59	2.55	2.56	4.21	1.58	2.5	13.38	9.34	9.24
167	41	yes	0	2	0	2	no	60	19.4	40	Negative	5	currently smoke	8	Cure		20.4	25	Improved	High	4349.25	3552.51	437.203	yes	yes	19.74	16.73	5.23	29.5	40.66	14.06	10.44	13.1	4.52	14.4289	3.29768	0.260775	3.68	2.46	3.67	2.23	1.91	1.74	7.55	5.59	0.87	13.46	9.96	6.28
168	23	no	1	88	2	86	Yes	84.5833	14.5	19.2	Positive	4	stopped smoking	>24	Fail		20	25.4	MIxed	Very high	1986.18	1477.95	1039.94	yes	no	32.14	31.36	21.7	25.29	18.24	23.68	7.6	10	4.36	21.3959	22.3096	12.5028	7.63	6.93	7.78	4.38	3.24	4.41	9	1.29	5.46	21.01	11.46	17.65
169	30	no	1	99	8	91	Yes	UE	27.2	20.2	Positive	11	currently smoke	>24	Fail		17.1	17.2	Mixed	Moderate	1564.74	2552.51	224.755	no	yes	19.92	23.15	2.82	16.78	20.22	14.72	6.36	3.6	4.13	30.9953	26.4287	14.0429	3.41	5.97	2.29	1.75	2.63	0.75	3.39	7.59	0.18	8.55	16.19	3.22
170	30	no	1	37	4	33	Yes	80.8333	22.7	40	Negative	6	currently smoke	8	Cure		14	17.3	Resolved	None	5761.98	2746.24	188.749	yes	yes	29.37	24.05	3.06	37.07	22.27	10.79	10.13	3.6	1.44	176.426	96.3822	114.417	5.15	3.8	1.38	2.63	1.6	0.29	1.17	0.93	0.02	8.95	6.33	1.69
171	45	yes	1	2	2	0	no	81.25	12.2	24.2	Positive	3	currently smoke	8	Cure		18.8	19.9	Improved	High	3376	3879.49	433.907	no	yes	19.58	23.88	4.85	34.58	39.33	14.92	12.08	11.8	4.21	53.383	45.0792	34.6441	4.15	5.45	3.43	2.61	3.94	1.03	4.97	5.46	0.21	11.73	14.85	4.67
										#REF!														72	70
										71
									Note: Where in yellow, the D2 CT value was taken, due to error or negative D0
												Note: where in pink D2 TTP was used, due to cont or neg D0
[truncated: 49 more columns]
